# Supplementary material for: The design and synthesis of a non-centric diamond-like network based NH4+ ionElectronic supplementary information (ESI) available: experimental data. See http://www.rsc.org/suppdata/cc/b3/b306253h/
Source: Royal Society of Chemistry journal article supplement (doi:10.1039/b306253h), 2003-01-01
Supplement: b306253h.doc [file b306253h.doc]

*Preparation*: compound **1.** Addition of methanol solution of NH4PF6 (0.5 mmol, 0.183 g) into the methanol solution of 4,4’-dipyridine-dioxide (1 mmol, 0.224 g) gave the precipitate immediately, which was heated with stirring to produce a clear solution, which was filtered, and the filtration was allowed to stand at room temperature. Upon evaporation, light yellow block-shaped single crystals were obtained after three days. Crystal yield based on dpdo is 38%. Elemental anal. for NH4(dpdo)2PF60.5H2OCalc: C, 43.76, H, 3.83; N, 12.76%. Found: C, 43.18, H, 3.97, N, 12.48%. The preparation of compound **2** followed the same procedure as **1**, only using *trans*-bis(4-pyridyl)ethylene-dioxide instead of 4,4'-dipyridine-dioxide. Crystal yield based on bpedo is 45%. Elemental anal. for NH4(bpedo)2PF62H2OCalc: C, 45.94, H, 4.50; N, 11.16%. Found: C, 46.01, H, 4.45, N, 11.04%. It gave a formula with one water molecule less than that from X-ray diffraction analysis since lattice water is easy to lose in air.

† Crystal data: Compound **1**, C20H21F6N5O4.5P, *M* = 548.39, tetragonal, *P*-4n2, *a* = b = 17.9935(13), *c* = 7.2554(7) Å, *U* = 2349.1(3) Å3, *Z* =4, *Dc* = 1.551 Mg m-3, ** = 0.205 mm-1, *F*(000) = 1124, *GoF* = 1.052. A total of 18737 reflections were collected and 2998 are unique (Rint = 0.040). *R*1 and *wR*2 are 0.0649 and 0.1816, respectively, for 248 parameters and 2627 reflections [*I* > 2 (*I*)]. Compound **2**, C24H30F6N5O7P, *M* = 645.50, tetragonal, I-42d, *a* = b = 28.0095(18), *c* = 7.4018(9) Å, *U* = 5807.0(9) Å3, *Z* = 8, *Dc* = 1.477 Mg m-3, ** = 0.184 mm-1, *F*(000) = 2672, *GoF* = 1.060. A total of 20508 reflections were collected and 2544 are unique (Rint = 0.0773). *R*1 and *wR*2 are 0.0884 and 0.2326, respectively, for 227 parameters and 2083 reflections [*I* > 2 (*I*)]. The data were collected on a SMART CCD 1000 with MoK radiation ( = 0.71073 Å) at 90K. The structures were solved by direction methods and refined by a full matrix least squares technique based on F2 using SHELXL 97 program.
